# Supplementary material for: Analysis of influencing factors and mediating effects of diabetes self-management behavior in patients with type 2 diabetes mellitus
Source: Research Square preprint supplement (doi:10.21203/rs.3.rs-6334182/v1), 2025-05-13
Supplement: Supplementary file 1 [file c98acb44653511e250bfa9d5.docx]

**Supplementary Table 1.** Basic data scale for T2DM.

This scale was self-designed and served as an important source of baseline patient data.

| **Questions** | **Options** |
| --- | --- |
| Sex | Male |
| Female |
| Age (years old) | <40 |
| 40–60 |
| >60 |
| Education level | Elementary and secondary education |
| High school education |
| University education |
| BMI (kg/m2) | <18.5 |
| 18.5–23.9 |
| >23.9 |
| Family history of DM | Yes |
| No |
| Duration of DM (years) | <5 |
| 5–10 |
| >10 |
| HbA1c level | ≥7% |
| <7% |
| Current treatment | Insulin |
| Oral medications |
| Types of DM drugs taken (types) | 0 |
| 1 |
| 2 |
| ≥3 |
| Number of hypoglycemia episodes in 3 months | <3 |
| 3–5 |
| >5 |
| Hypoglycemia level | Mild |
| Moderate |
| Severe |
| FBG (mmol/L) | ≤6.10 |
| >6.10 |
| TG (mmol/L) | ≤1.70 |
| >1.70 |
| TC (mmol/L) | ≤5.70 |
| >5.70 |
| HDL-C (mmol/L) | <0.90 |
| 0.90–2.19 |
| >2.19 |
| LDL-C (mmol/L) | ≤3.37 |
| >3.37 |
| Smoking history | Yes |
| No |
| Drinking history | Yes |
| No |
| Intake of sweets | Yes |
| No |
| Intake of fried foods | Yes |
| No |
| Regular screening for complications of DM | Yes |
| No |
| Complications of DM | Yes |
| No |
| Hypertension | Yes |
| No |
| Duration of Hypertension (years) | <5 |
| 5–10 |
| >10 |
| Family history of hypertension | Yes |
| No |
| Types of hypertension drugs taken (types) | 0 |
| 1 |
| 2 |
| ≥3 |

Abbreviations: DM, diabetes mellitus; BMI, body mass index; HbA1c, glycosylated hemoglobin; FBG, fasting blood glucose; TG, triglyceride; TC, total cholesterol; HDL-C, high-density lipoprotein cholesterol; LDL-C, low-density lipoprotein cholesterol
